# Supplementary material for: Pro-Inflammatory Cytokines Trigger the Overexpression of Tumour-Related Splice Variant RAC1B in Polarized Colorectal Cells
Source: MDPI journal article supplement (doi:10.3390/cancers14061393), 2022-03-09

## Supplementary File S1

### Original Western blot film exposures

Manuscript title:

**Pro-inflammatory cytokines trigger the overexpression of tumour-related splice variant RAC1B in polarized colorectal cells**

Joana F. S. Pereira<sup>1,2</sup>, Cláudia Bessa<sup>1,2</sup>, Paulo Matos<sup>1,2</sup>, Peter Jordan<sup>1,2</sup>

<sup>1</sup>Department of Human Genetics, National Health Institute Dr. Ricardo Jorge, Lisbon, Portugal; <sup>2</sup>BiolSI – Biosystems & Integrative Sciences Institute, Faculty of Sciences, University of Lisbon, Lisbon, Portugal

**we show **box-marked** in red color the areas selected from the original images that were used to assemble the final figure, also indicating the antibody used for staining (the corresponding final Figure is shown again on the right hand of each page)**

Figure 1C

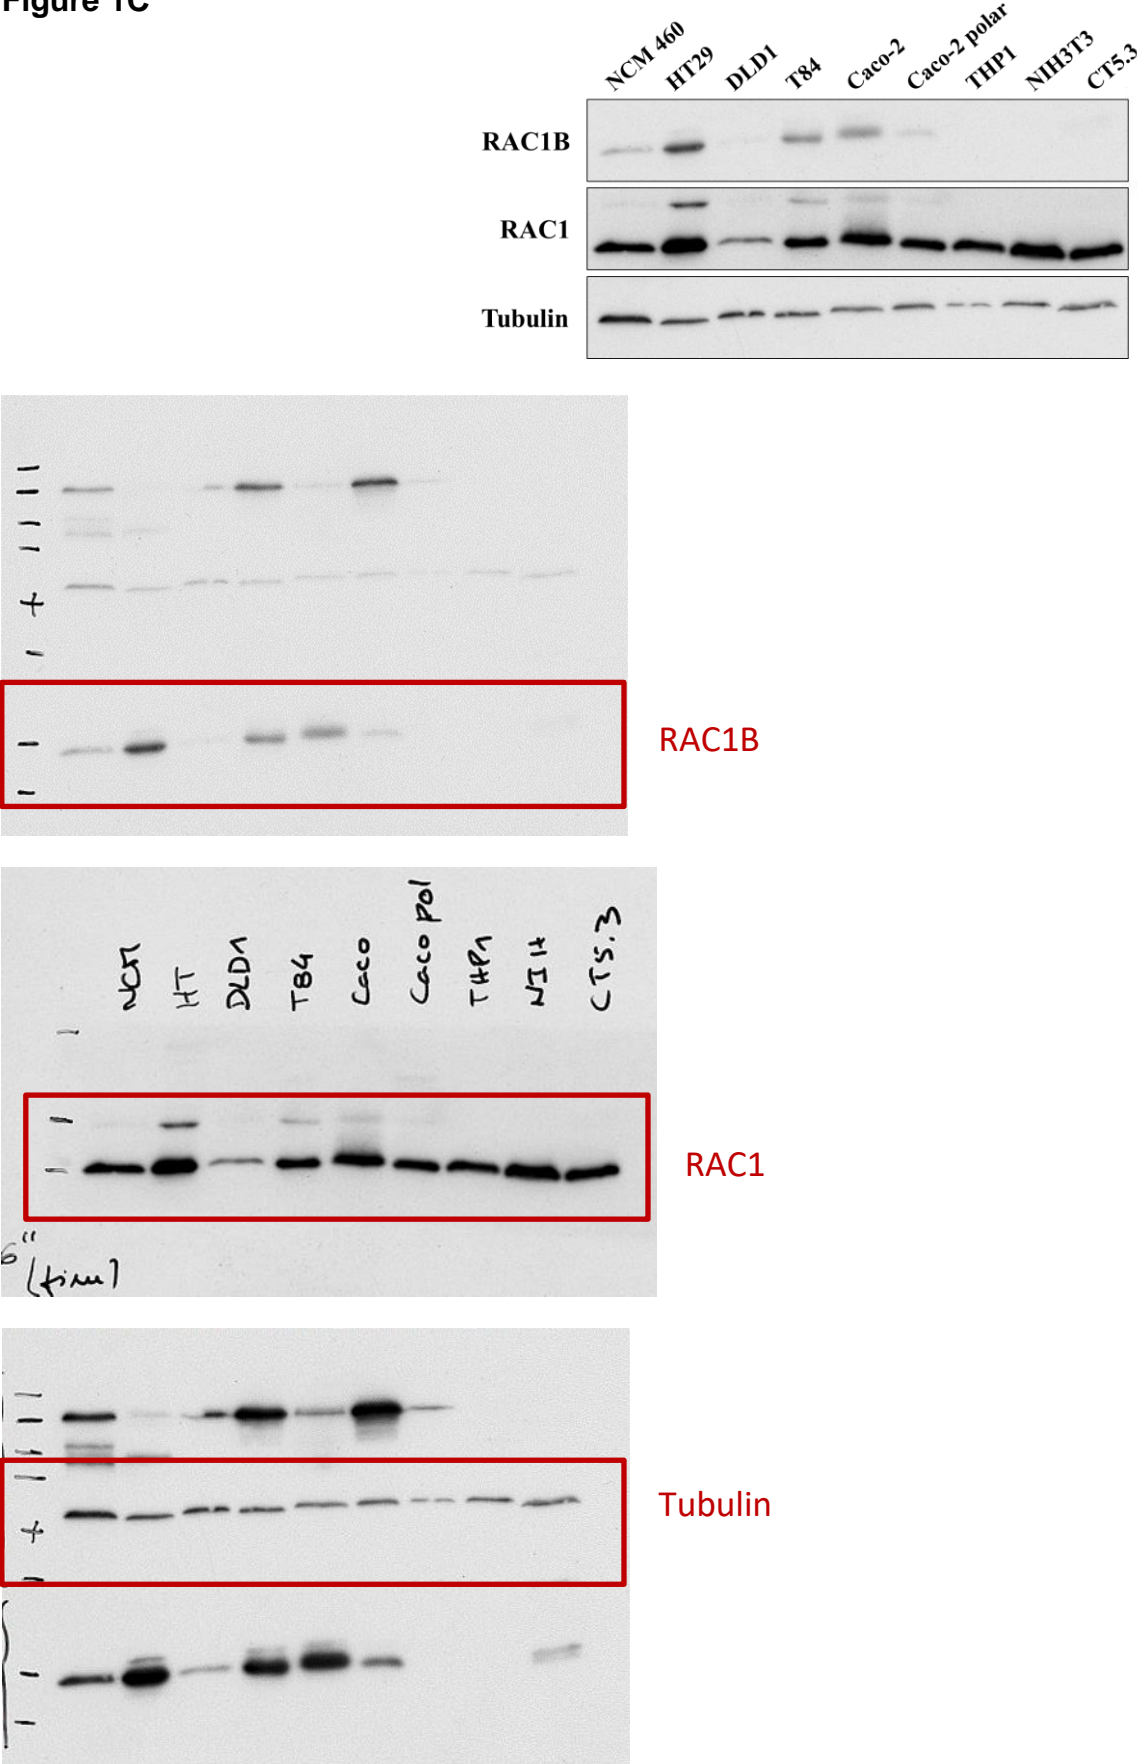

Figure 3A

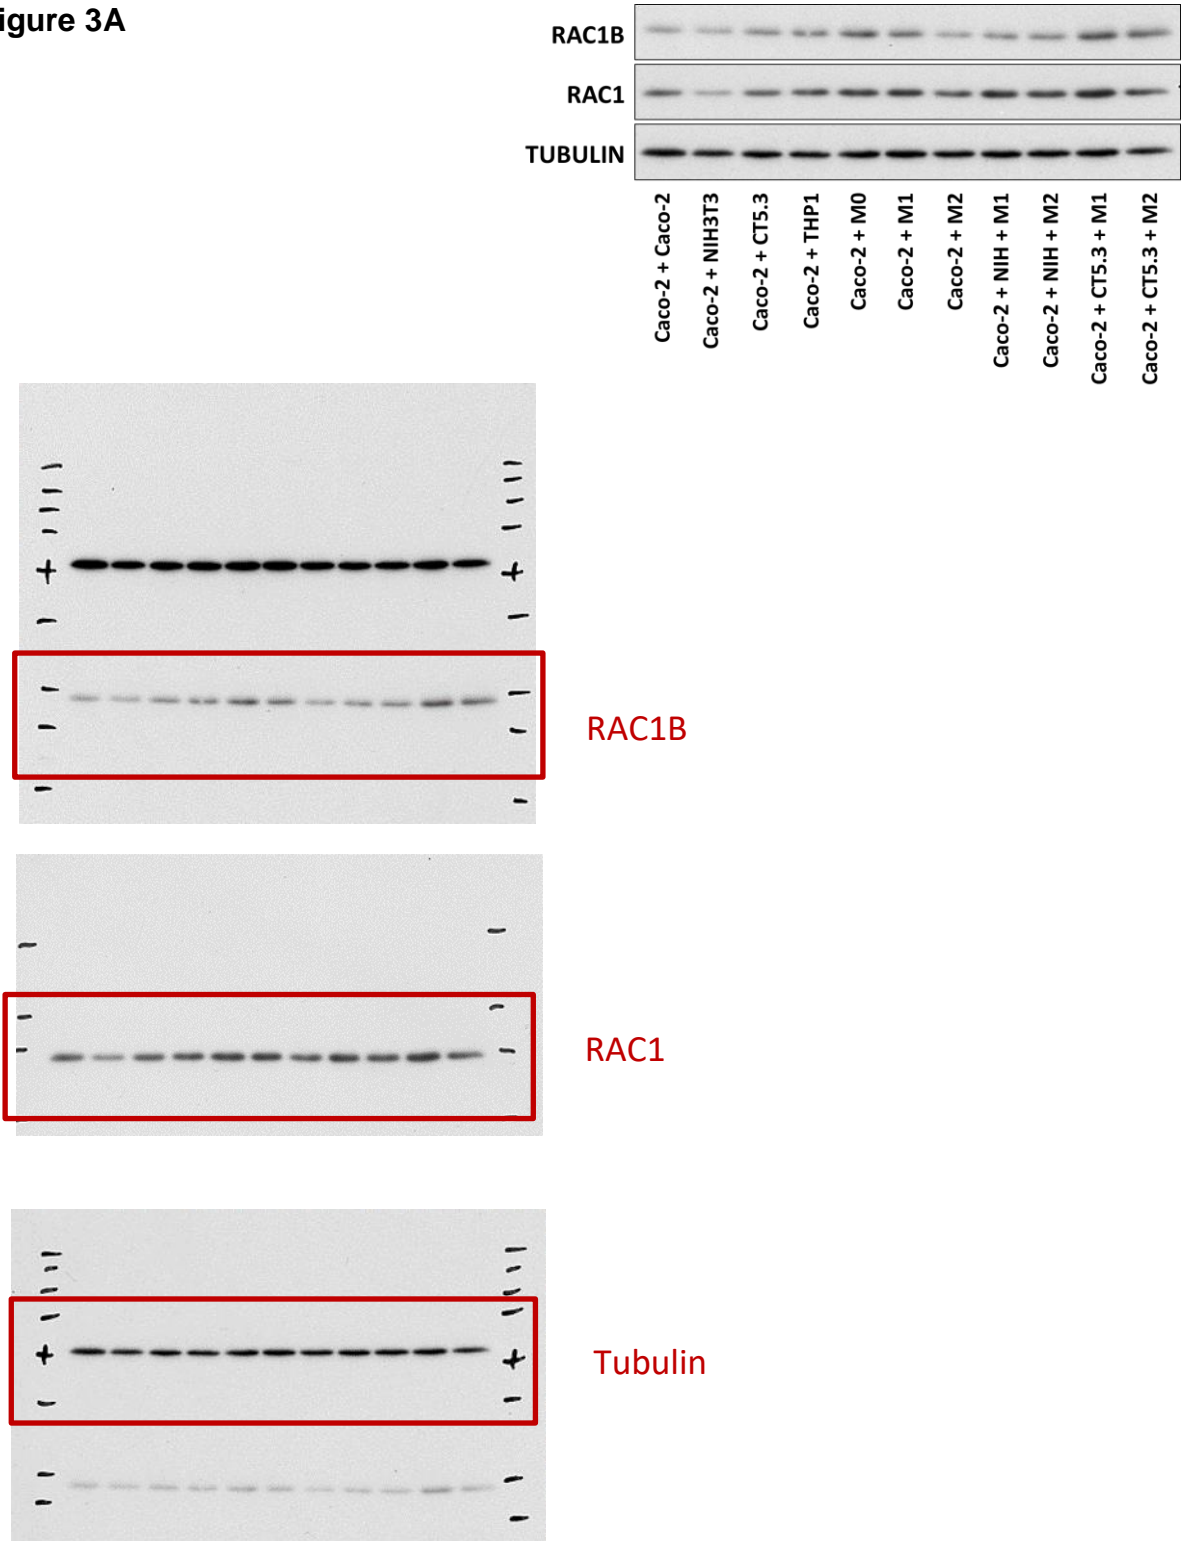

Figure 4A

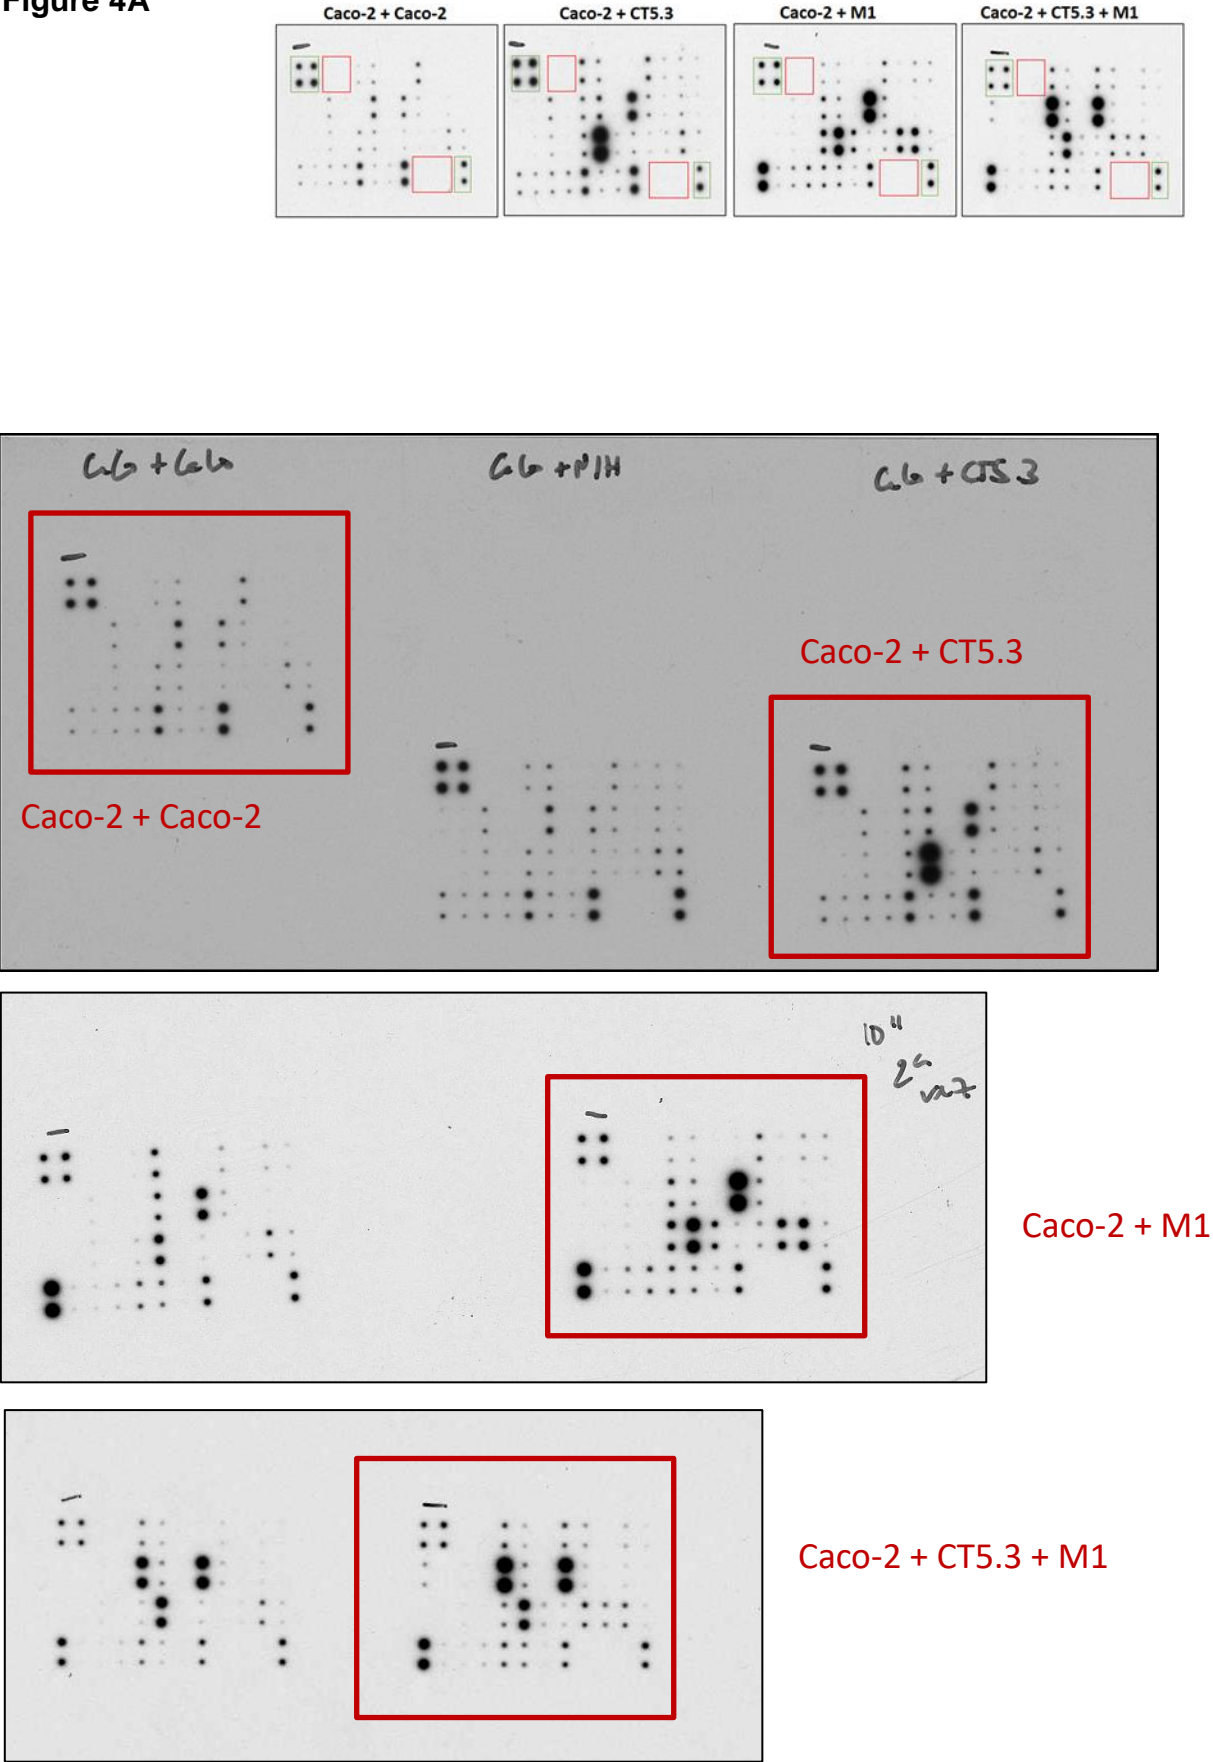

Figure 5A

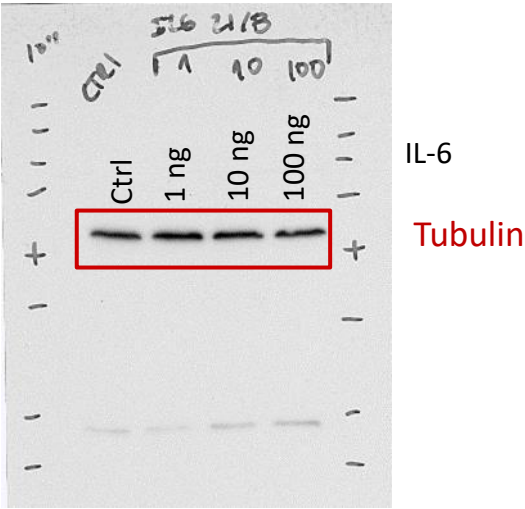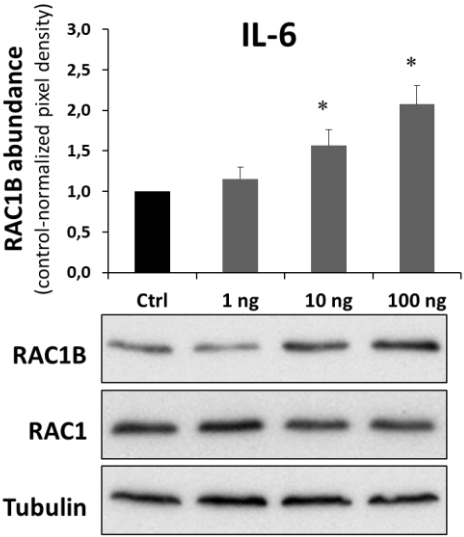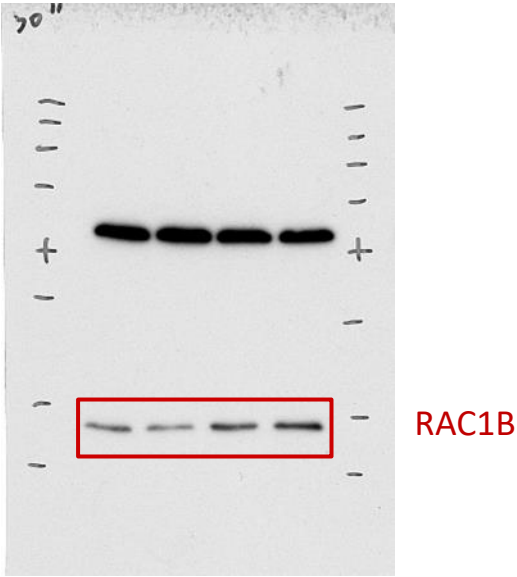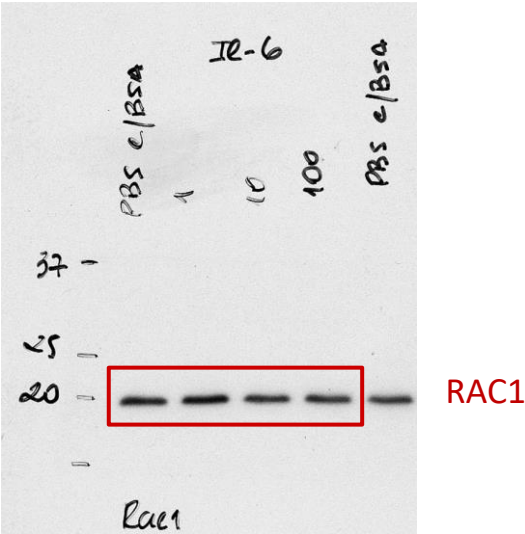

Figure 5B

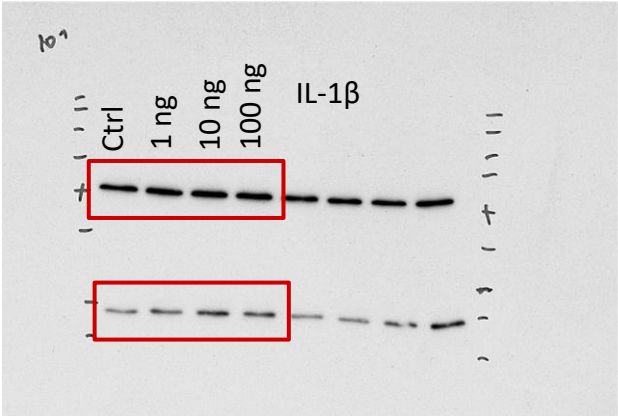

Tubulin

RAC1B

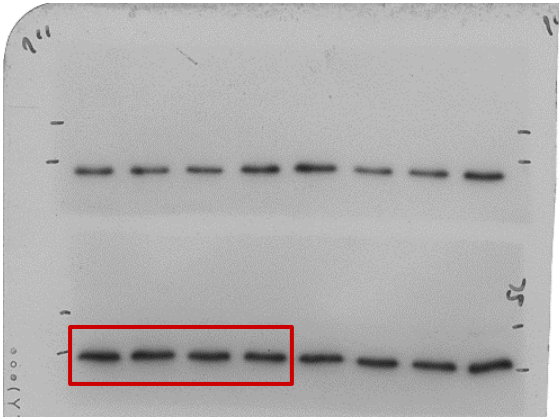

RAC1

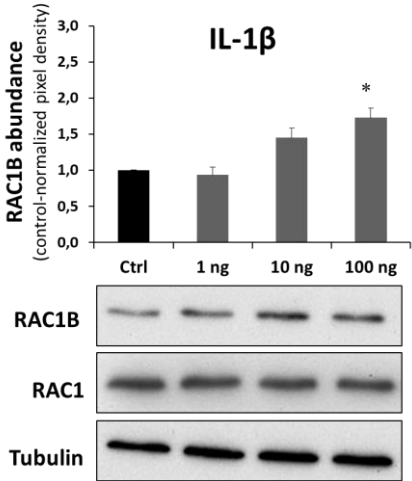

Figures 5C + D

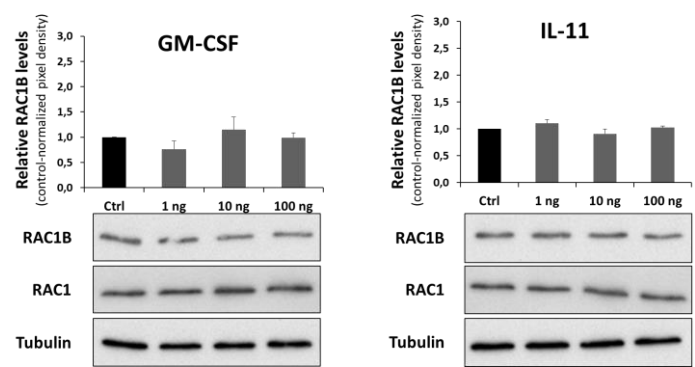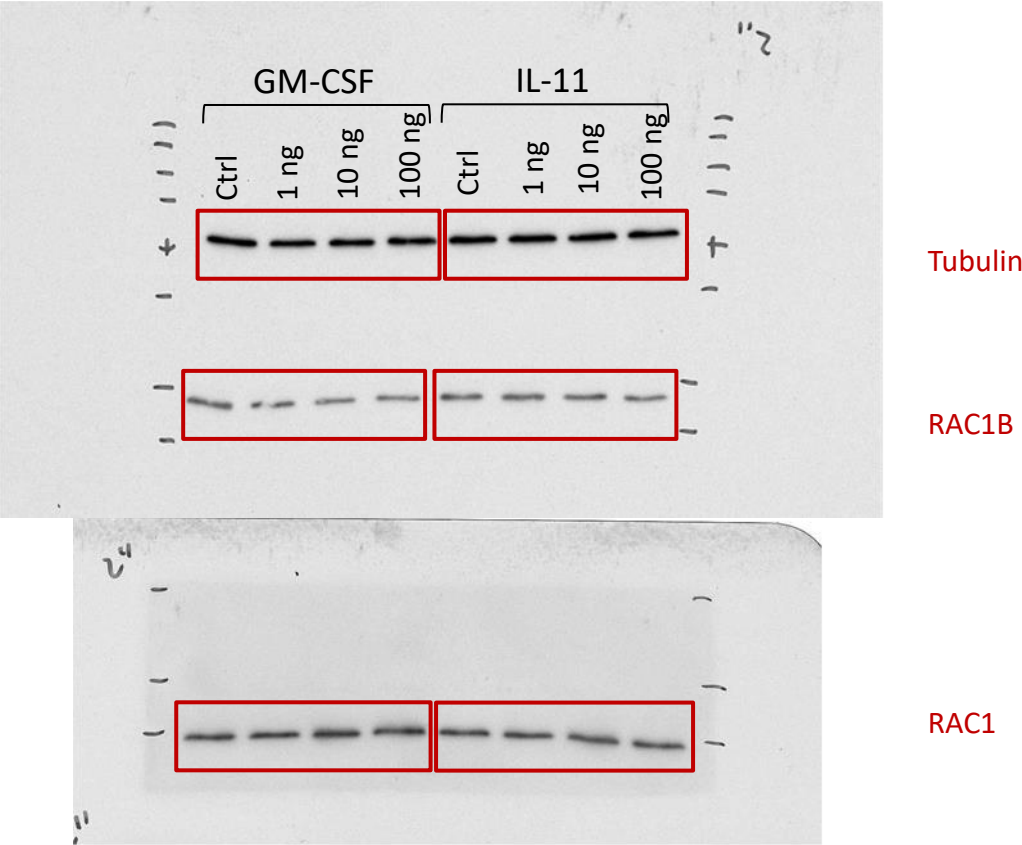

Figure 6A

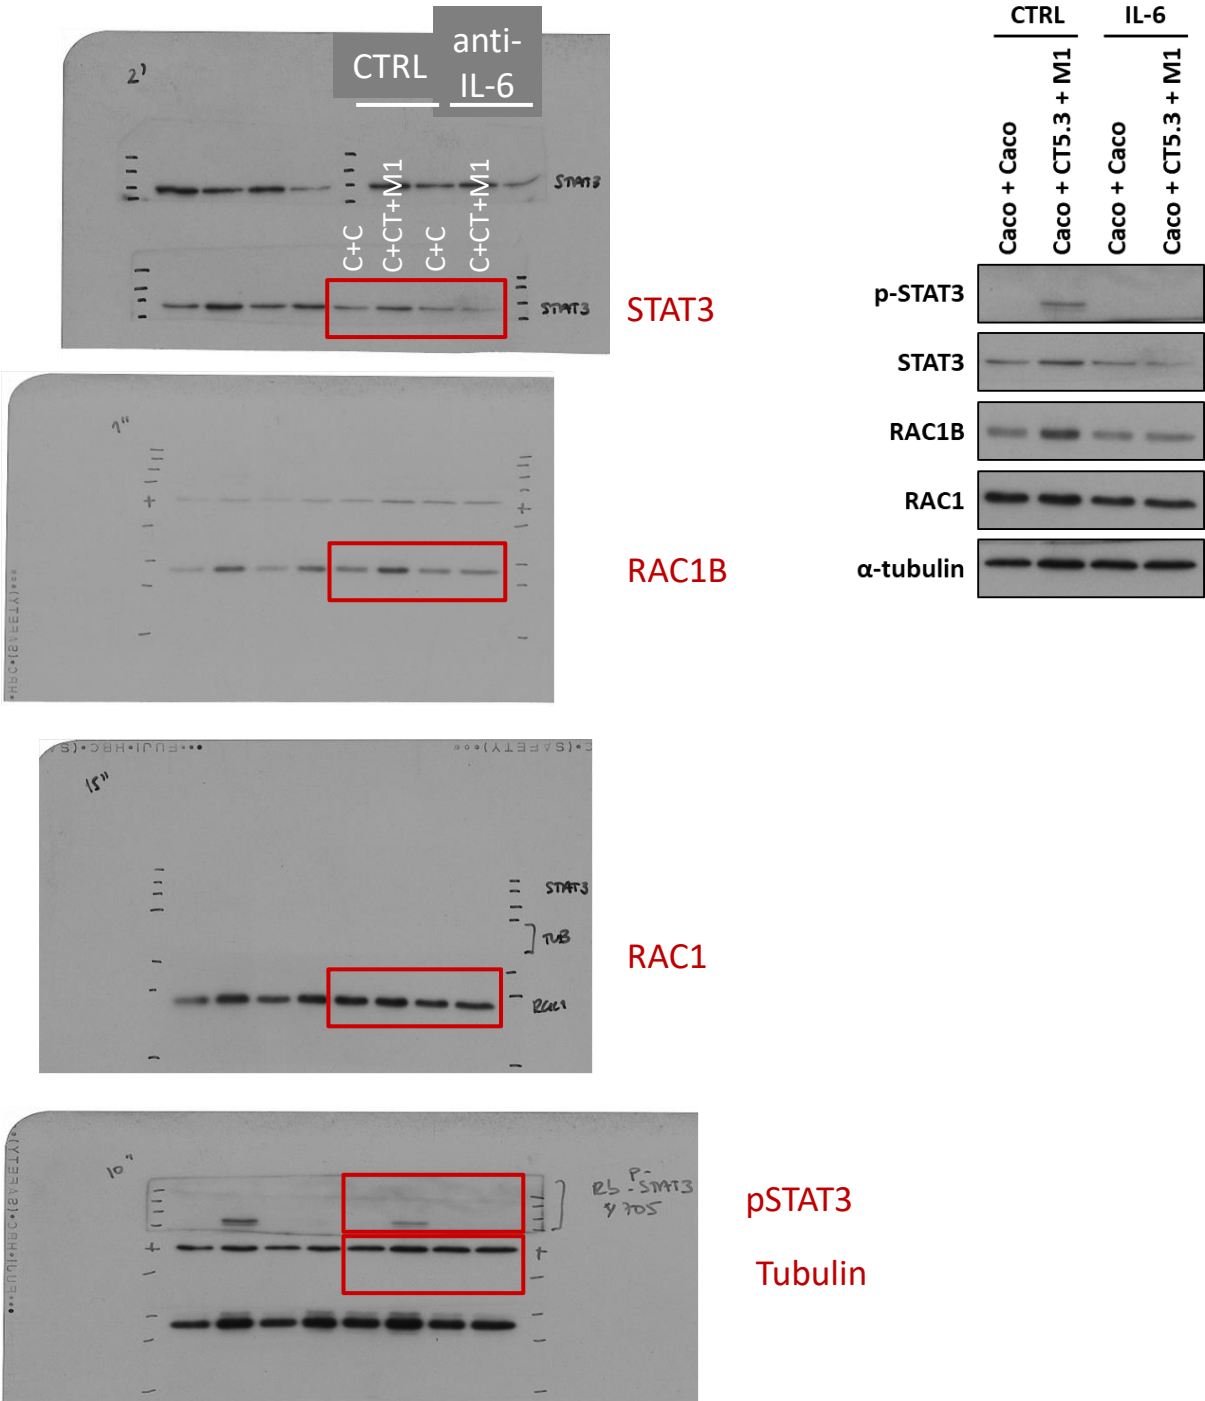

**Figure 6B**

anti-IL-1 $\beta$  3.3.2021

CTRL IL-1 $\beta$

C+C C+CT+M1 C+C C+CT+M1

p-SMAD3 (1/70s)

$\alpha$ -TUB

Rac1b

| Protein         | CTRL C+C   | CTRL C+CT+M1 | IL-1 $\beta$ C+C | IL-1 $\beta$ C+CT+M1 |
|-----------------|------------|--------------|------------------|----------------------|
| p-SMAD3 (1/70s) | Low        | Low          | High             | High                 |
| $\alpha$ -TUB   | Consistent | Consistent   | Consistent       | Consistent           |
| Rac1b           | Consistent | Consistent   | Consistent       | Consistent           |

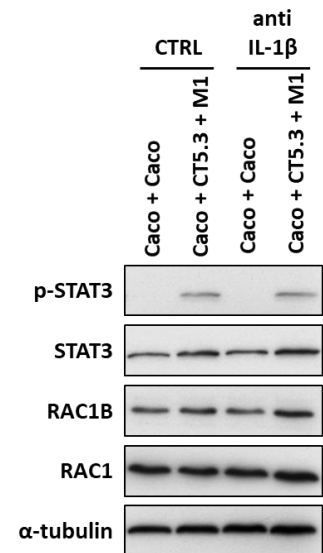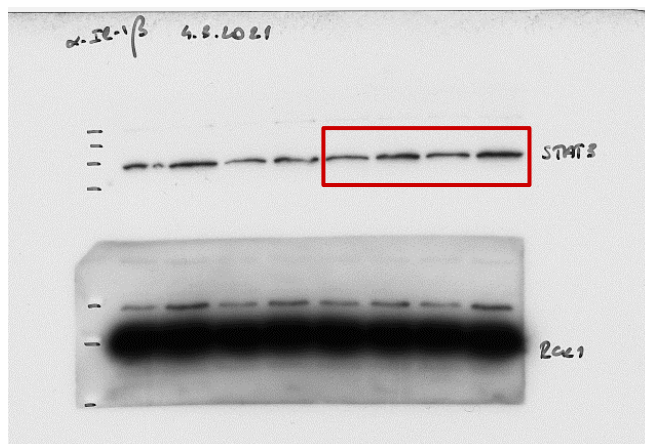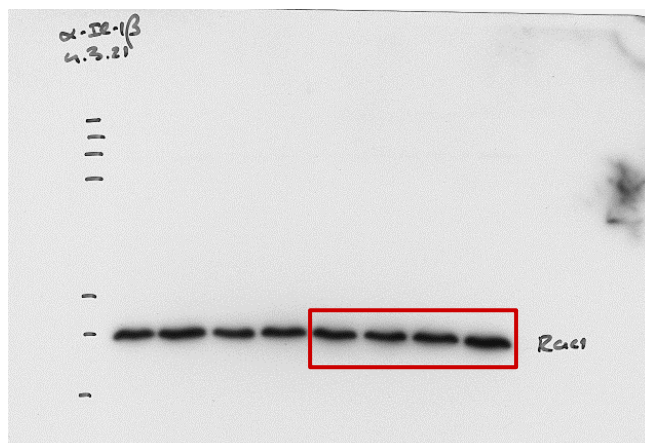

Figure 6C

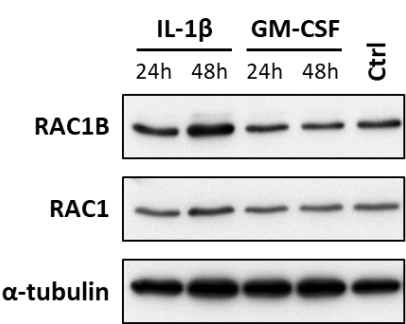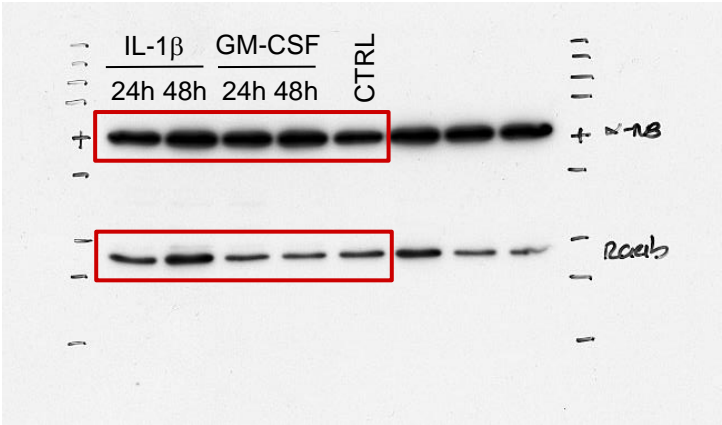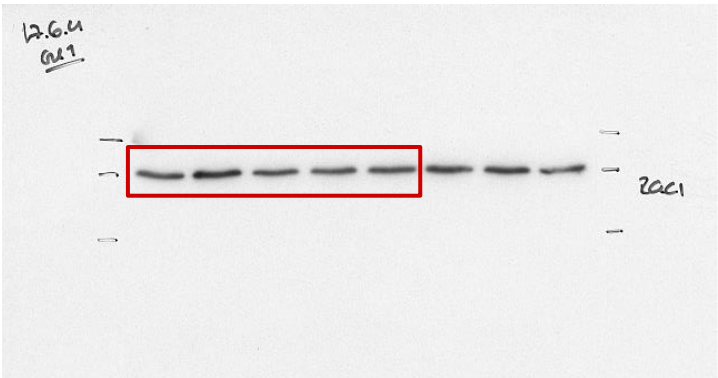

Figure 7B

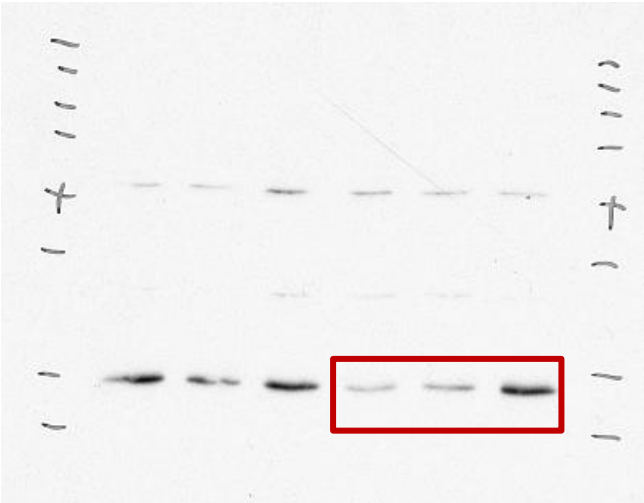

RAC1B

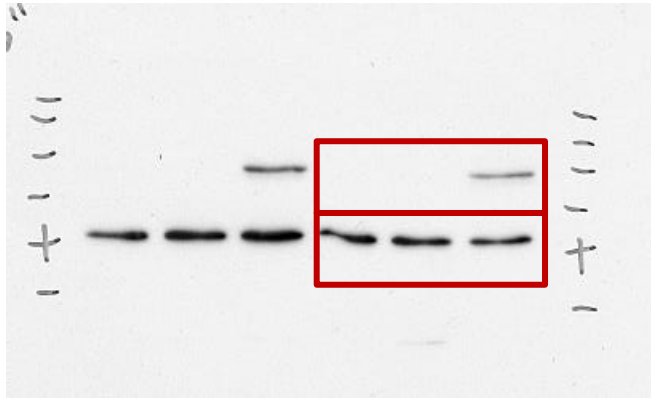

pSTAT3

Tubulin

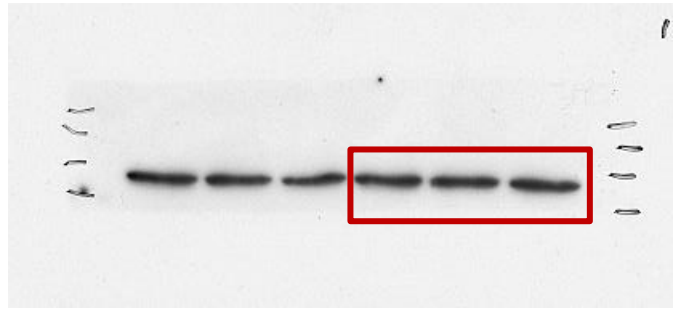

STAT3

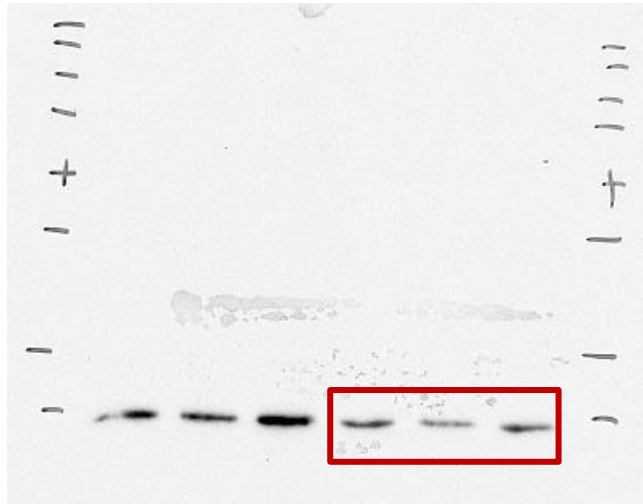

RAC1

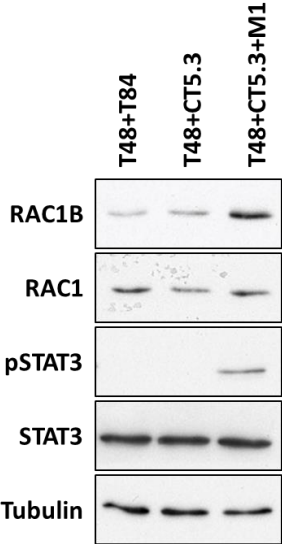

Figure 7E

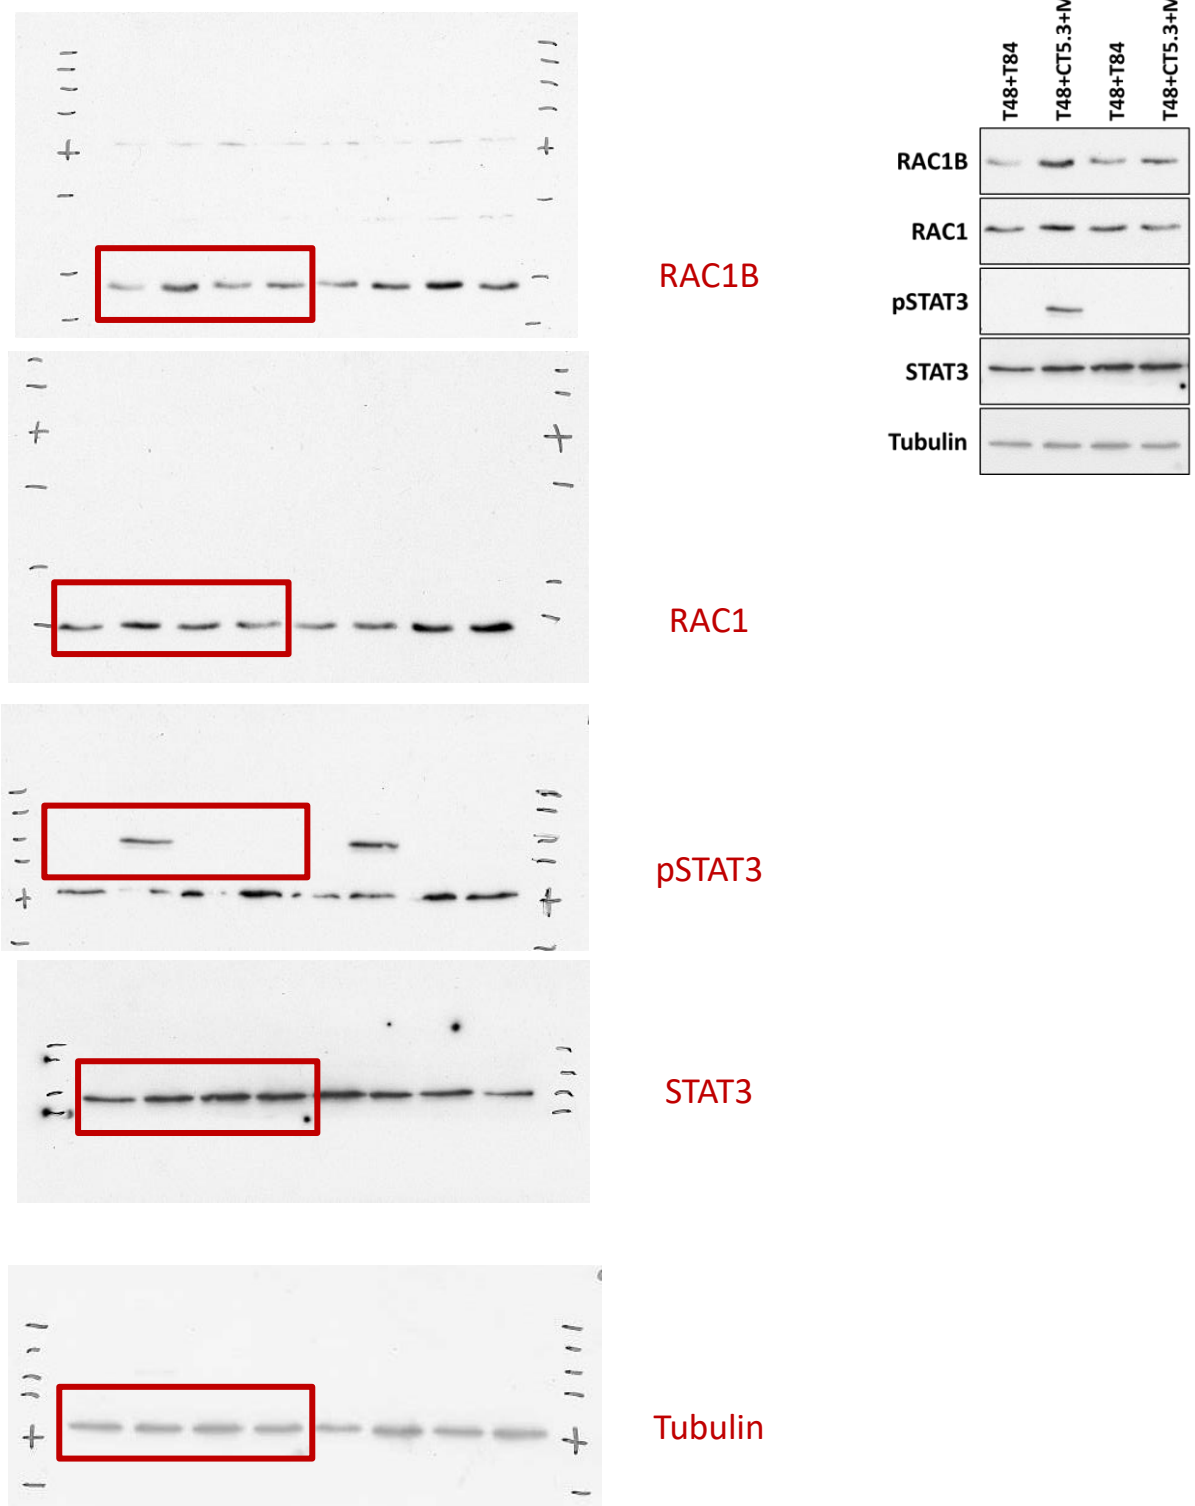

Figure 7 G

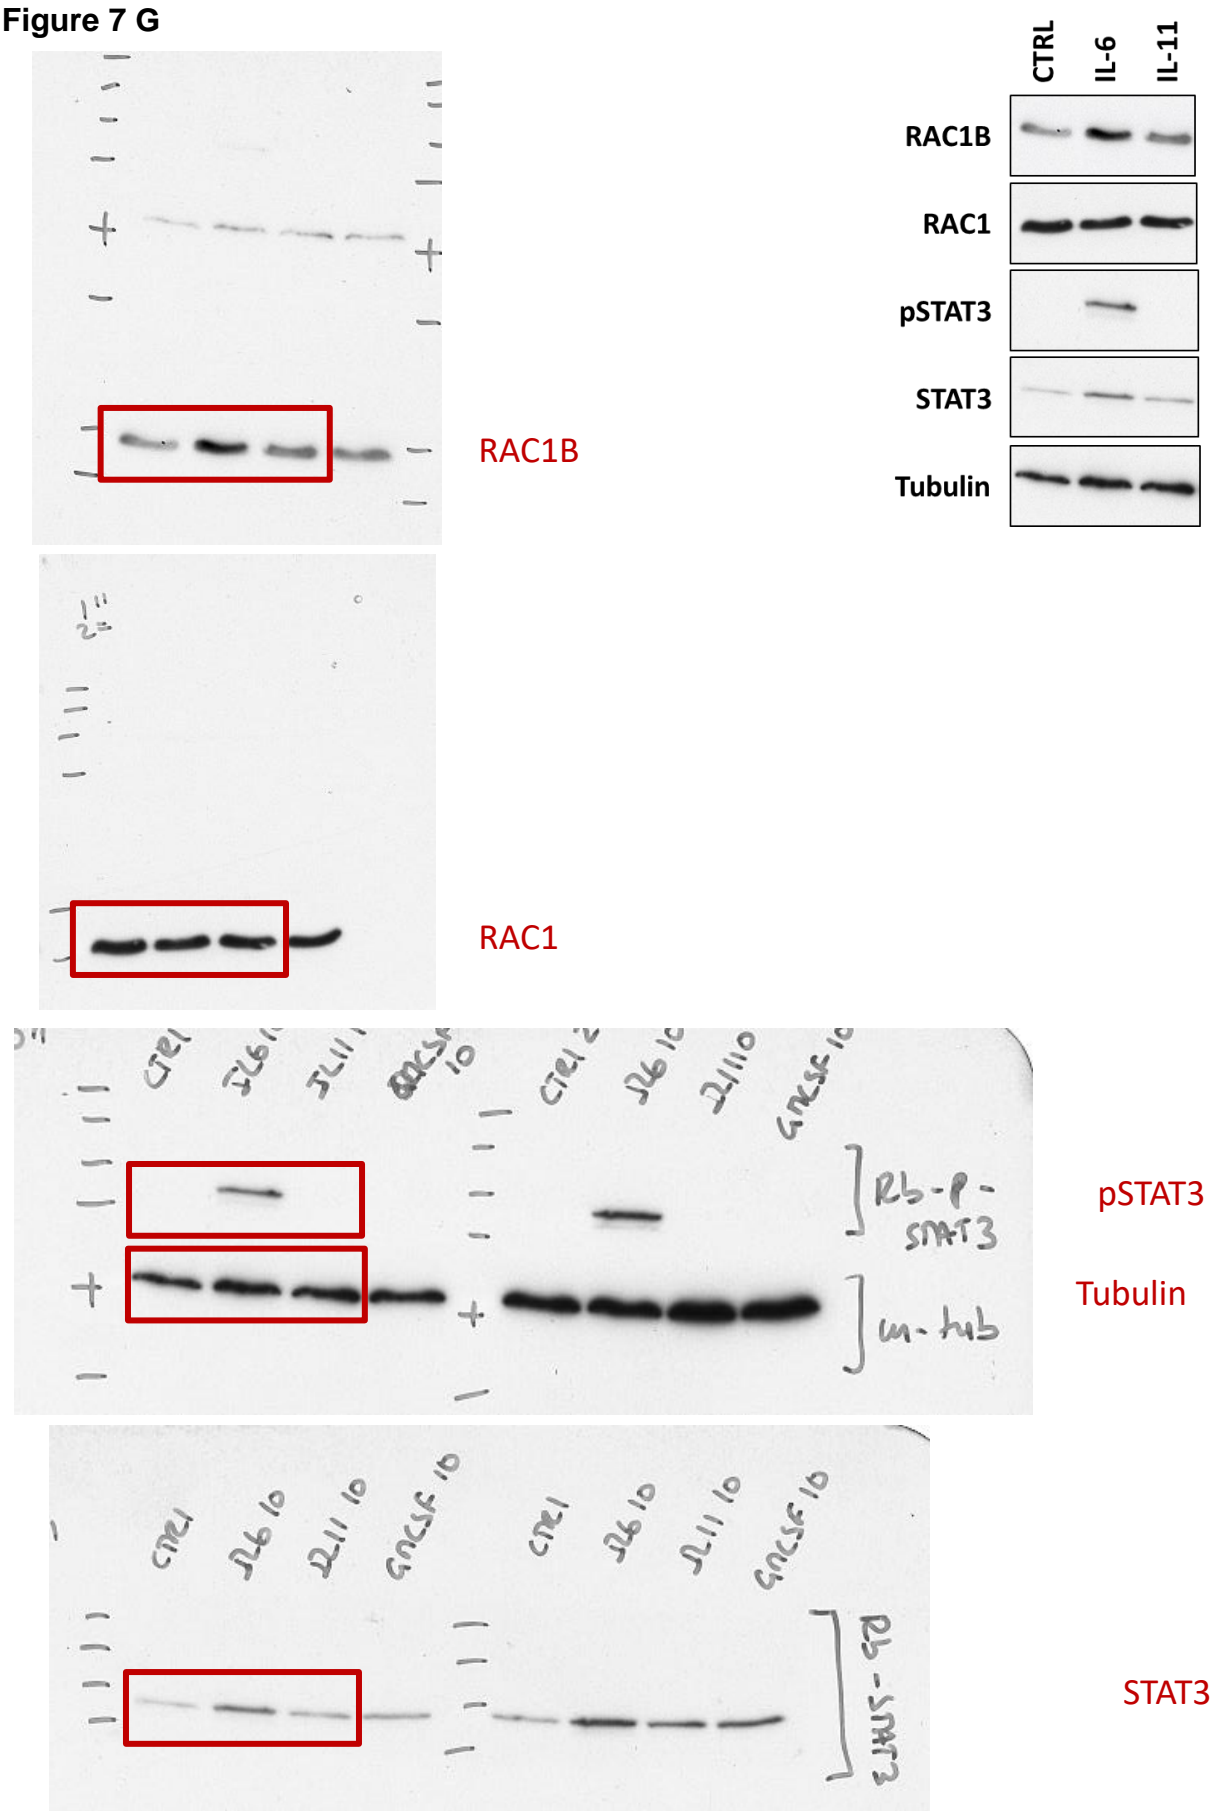

Figure S1A

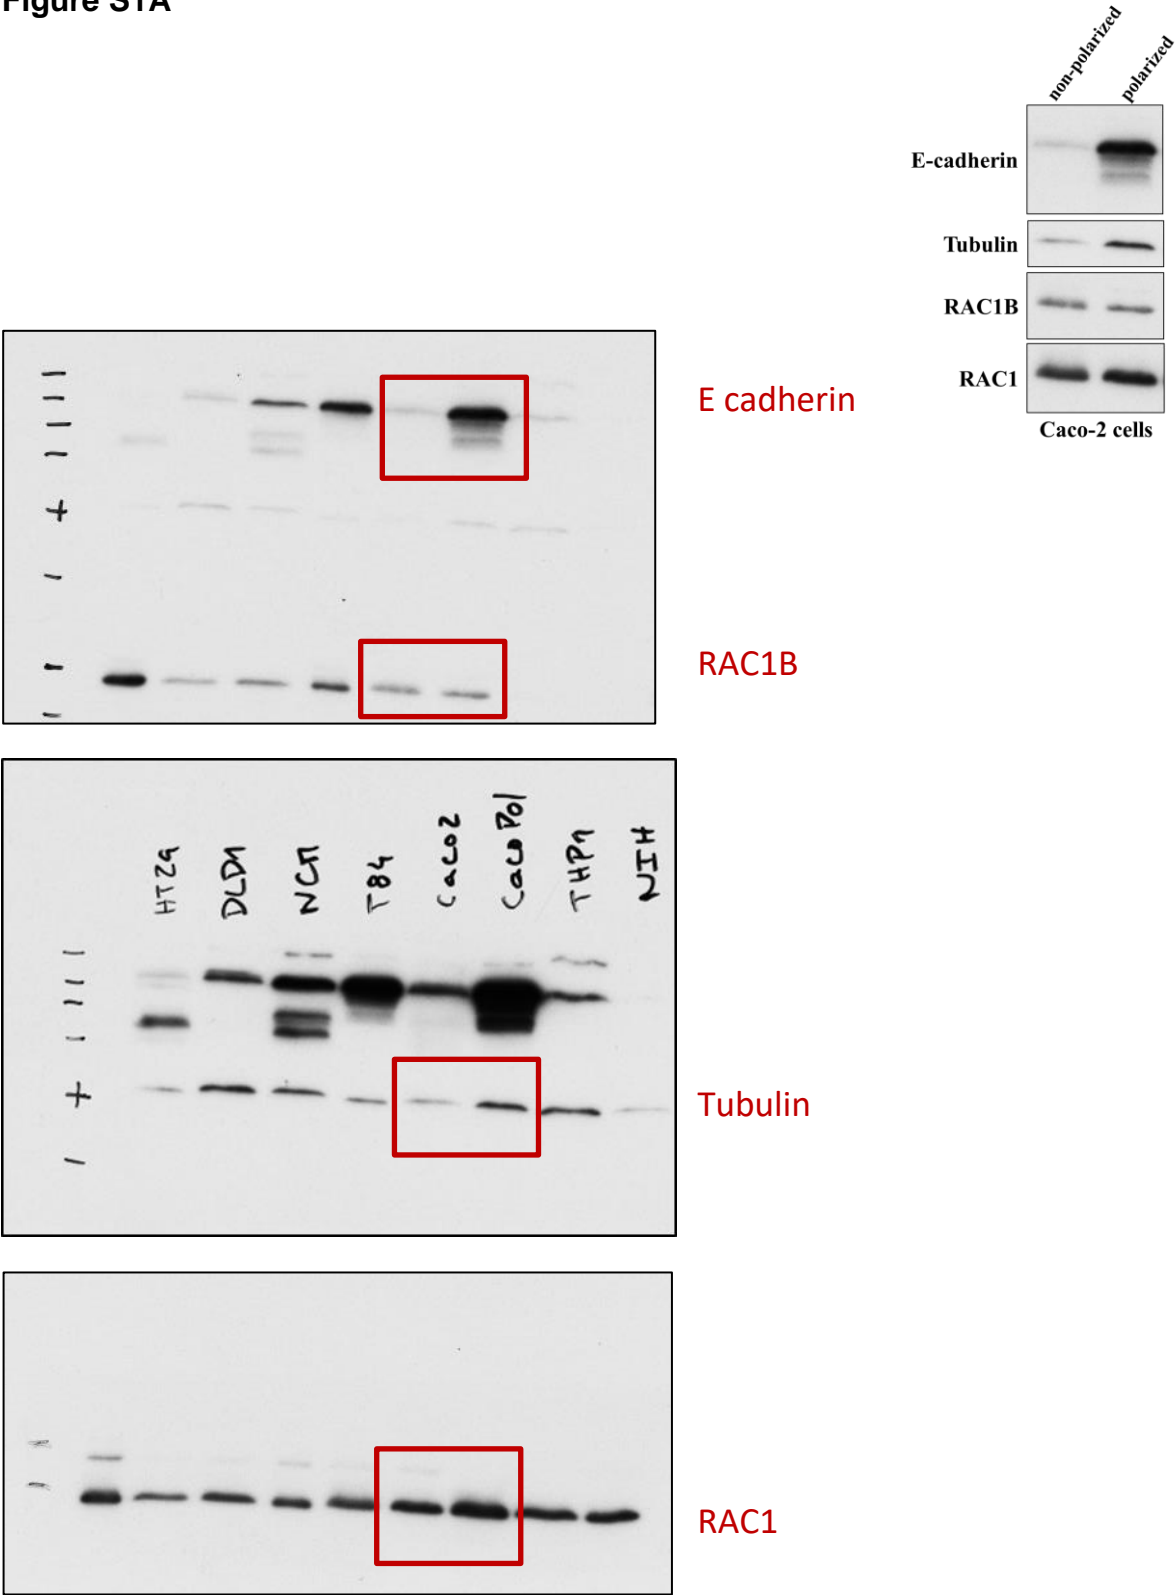

Figure S3A

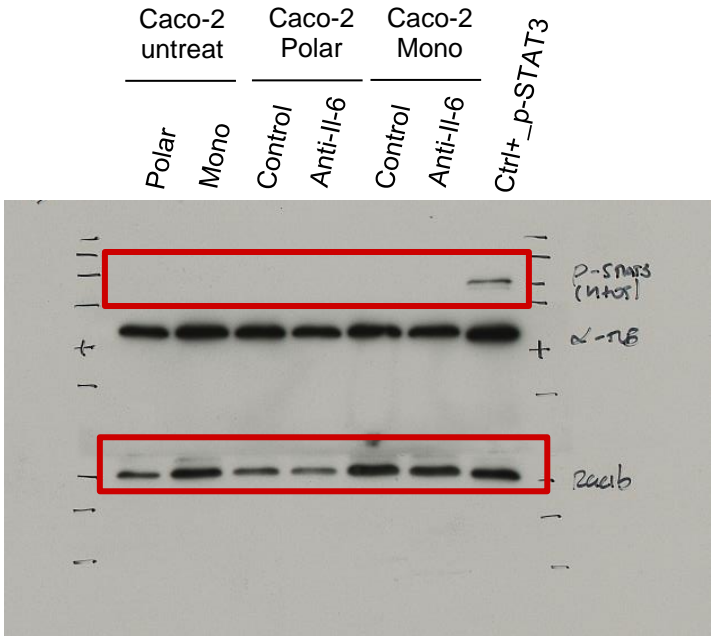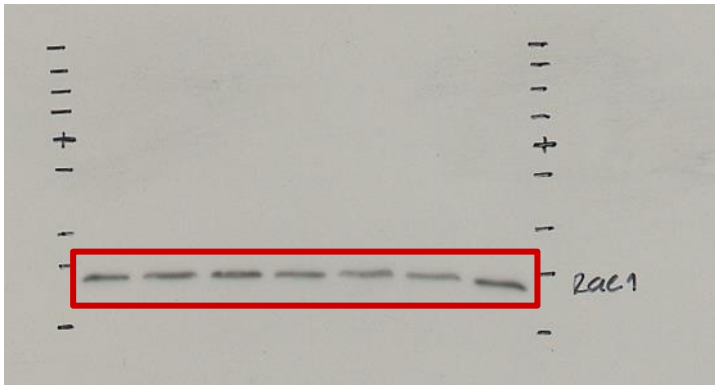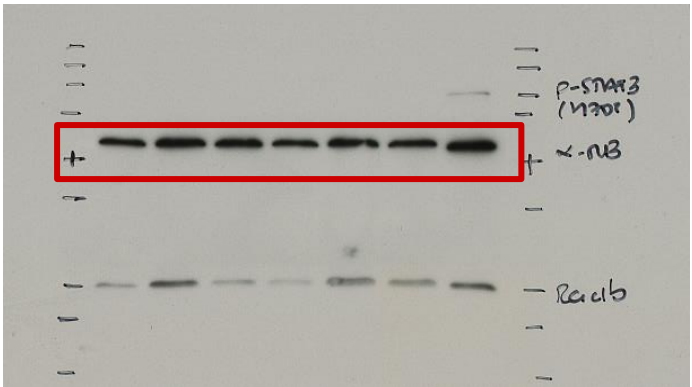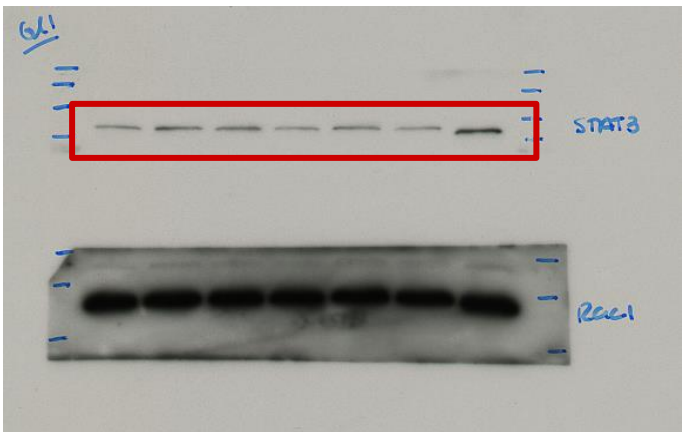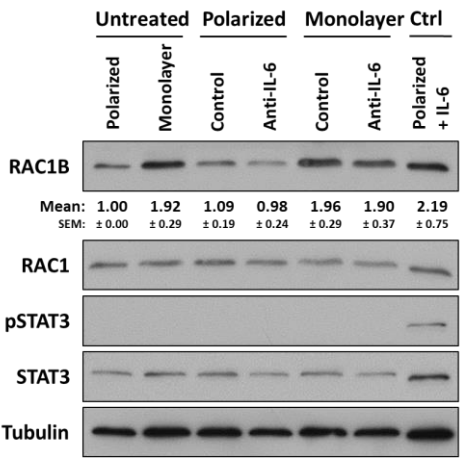

pSTAT3

RAC1B

RAC1

Tubulin

STAT3

Figure S3B

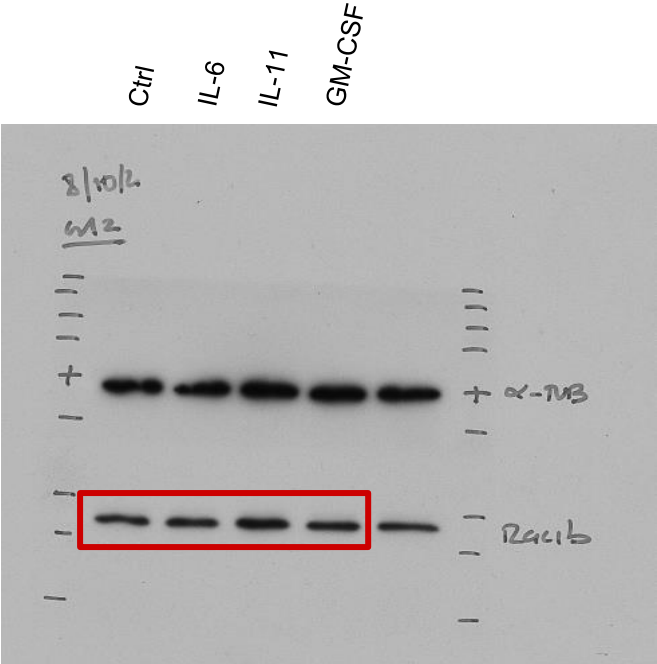

RAC1B

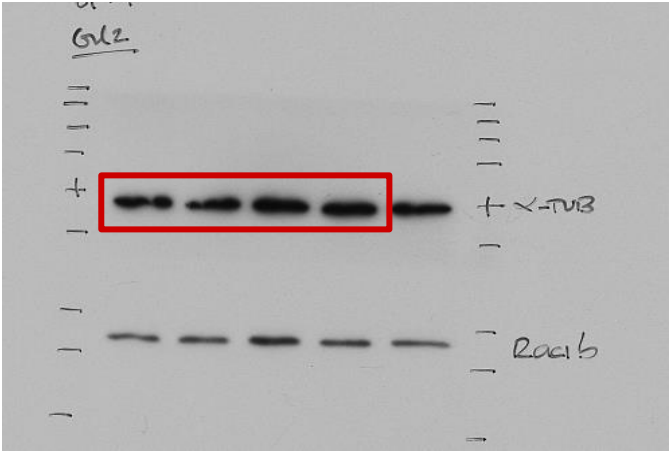

Tubulin

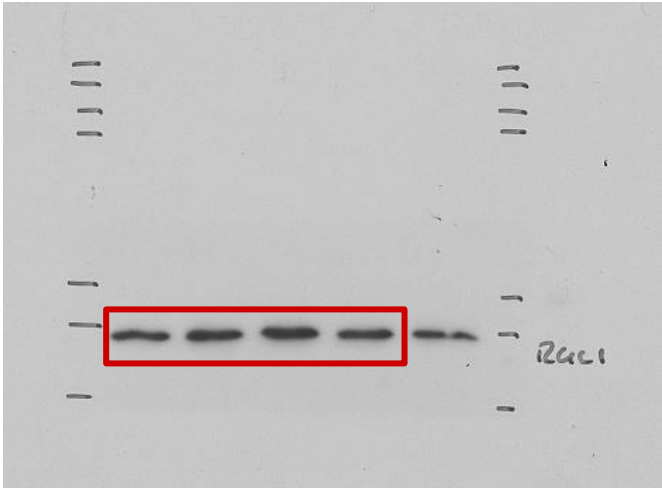

RAC1

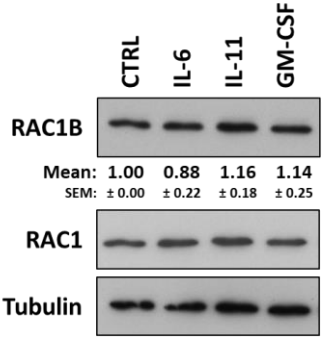

Supplement: s1 [file s1 › Suppl File S1_Original WB exposures.pdf]
