# Supplementary material
Source: MDPI journal article supplement (https://www.mdpi.com/2072-6694/14/6/1393)
Supplement: s1 [file s1]

Archive with 2 entries (2 files):
- Suppl File S1_Original WB exposures.pdf
- Suppl File S2_supplementary Figures and Tables.pdf
